# Supplementary material for: Influence of a solution-deposited rutile layer on the morphology of TiO2 nanorod arrays and the performance of nanorod-based dye-sensitized solar cells
Source: Royal Society of Chemistry journal article supplement (doi:10.1039/c5ra24888d), 2016-01-01
Supplement: c5ra24888d1.pdf [file c5ra24888d1.pdf]

## Electronic Supplementary Information

### Influence of solution-deposited rutile layer on morphology of TiO<sub>2</sub> nanorod arrays and performance of nanorod-based dye- sensitized solar cells

Zhixin Jin,\*\* Yinglin Wang,\*\* Shixin Chen, Gang Li, Lingling Wang, Hancheng Zhu, Xintong Zhang,\* Yichun Liu

Center for Advanced Optoelectronic Functional Materials Research, and Key Laboratory of UV  
Light-Emitting Materials and Technology of Ministry of Education,  
Northeast Normal University, Changchun 130024, People's Republic of China  
Tel./Fax: +86 431 85099772; E-mail: xtzhang@nenu.edu.cn.

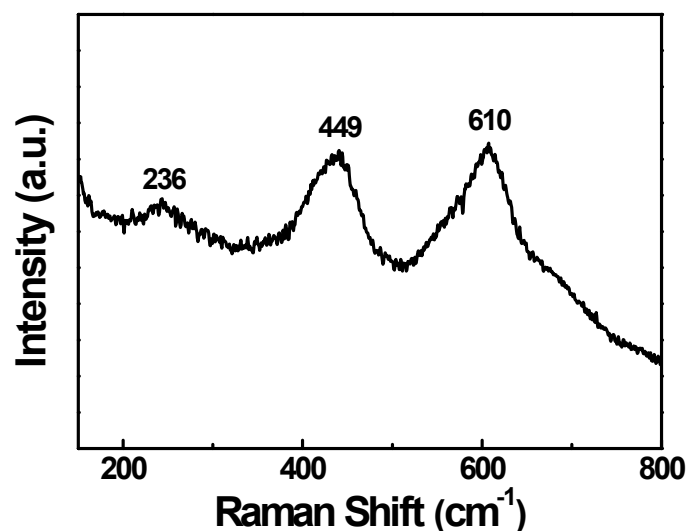

**Figure S1.** Raman spectrum of the rutile seed layer deposited onto conducting glass *via* hydrolysis of TiCl<sub>4</sub> solution.

**Table S1.** Structural properties of TiO<sub>2</sub> NR arrays grown on bare FTO and TiO<sub>2</sub> seed layers which were deposited from TiCl<sub>4</sub> precursor solutions with concentrations of 0.05, 0.2, and 0.4 M, respectively.

| samples   | The density of TiO <sub>2</sub> NRs (number μm <sup>-2</sup> ) | The length of TiO <sub>2</sub> NRs (μm) | The diameter of TiO <sub>2</sub> NRs (nm) |
|-----------|----------------------------------------------------------------|-----------------------------------------|-------------------------------------------|
| FTO-NR    | 24 ± 4                                                         | 1.2 ± 0.05                              | 82 ± 25                                   |
| 0.05 M-NR | 39 ± 8                                                         | 1.3 ± 0.05                              | 80 ± 24                                   |
| 0.2 M-NR  | 58 ± 8                                                         | 1.3 ± 0.06                              | 60 ± 10                                   |

---

**0.4 M-NR** $99 \pm 13$  $1.5 \pm 0.06$  $52 \pm 9$ 

---

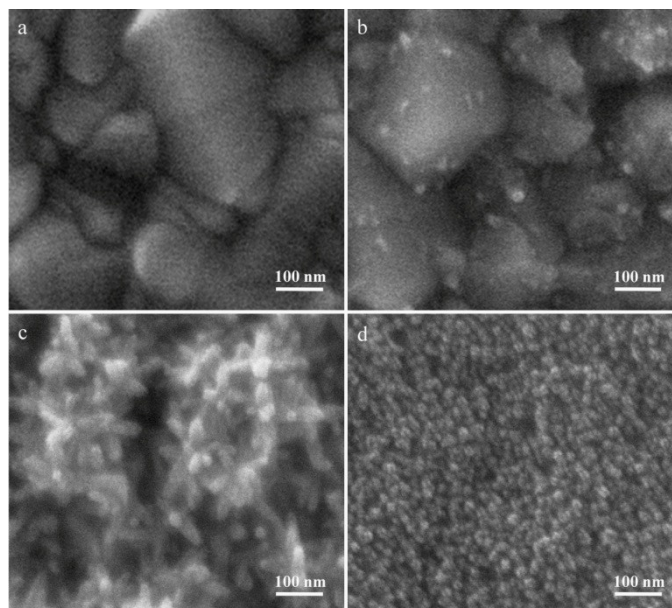

**Figure S2.** Top-view SEM images of the TiO<sub>2</sub> NR arrays grown at 150 °C for 30 min on bare FTO (a) and TiO<sub>2</sub> seed layers which were deposited from TiCl<sub>4</sub> precursor solutions with concentrations of 0.05 (b), 0.2 (c), and 0.4 M (d), respectively.

**Table S2.** Series resistance ( $R_s$ ), charge transfer resistance ( $R_1$ ), interfacial recombination resistance ( $R_2$ ) from EIS spectra calculated by equivalent circuit as shown in Fig.8.

| <b>samples</b>   | <b><math>R_s</math> (<math>\Omega</math>)</b> | <b><math>R_1</math> (<math>\Omega</math>)</b> | <b><math>R_2</math> (<math>\Omega</math>)</b> |
|------------------|-----------------------------------------------|-----------------------------------------------|-----------------------------------------------|
| <b>0.05 M-NR</b> | 30.74                                         | 1.14                                          | 331.2                                         |
| <b>0.2 M-NR</b>  | 31.33                                         | 1.31                                          | 304.6                                         |
| <b>0.4 M-NR</b>  | 38.45                                         | 2.89                                          | 237.4                                         |
